# Supplementary material for: Epidemiological Characteristics and Survival in Patients with de novo Metastatic Prostate Cancer.
Source: Preprints.org preprint supplement (doi:10.20944/preprints202008.0117.v1), 2020-08-05
Supplement: Supplementary file 2 [file supplementary]

**Table S1. Multivariate model for OS in cohort B and C.**

|  | | Number of patients | HR | 95% CI | |  |
| --- | --- | --- | --- | --- | --- | --- |
| Lower | Upper | p |
| Age (years)  Race  Metastatic stage  Year of diagnosis | 15-54 | 1569 |  |  |  | <0.001 |
| 55-64 | 4884 | 0.98 | 0.91 | 1.05 | 0.535 |
| 65-74 | 5859 | 1.04 | 0.97 | 1.11 | 0.245 |
| 75-84 | 5018 | 1.41 | 1.32 | 1.51 | <0.001 |
| ≥85 | 2262 | 2.25 | 2.09 | 2.42 | <0.001 |
| White | 12252 |  |  |  | <0.001 |
| Black | 3726 | 1.10 | 1.05 | 1.15 | <0.001 |
| American Indian/Alaska Native | 133 | 1.08 | 0.89 | 1.32 | 0.429 |
| Asian or Pacific Islander | 1113 | 0.72 | 0.67 | 0.78 | <0.001 |
| Hispanic | 2368 | 0.93 | 0.88 | 0.98 | 0.010 |
|  |  |  |  |  |  |
| M1a  M1b  M1c  2004-2010  2011-2014 | 1088  14250  4254  11391  8201 | 1.39  1.77  0.94 | 1.28  1.63  0.91 | 1.51  1.93  0.97 | <0.001  <0.001  <0.001  0.001 |

HR: Hazard ratios. 95% CI: 95% confidence intervals.

**Table S2. Multivariate model for CSS in cohort B and C.**

|  | | Number of patients | HR | 95% CI | |  |
| --- | --- | --- | --- | --- | --- | --- |
| Lower | Upper | p |
| Age (years)  Race  Metastatic stage  Year of diagnosis | 15-54 | 1547 |  |  |  | <0.001 |
| 55-64 | 4823 | 0.94 | 0.88 | 1.01 | 0.100 |
| 65-74 | 5760 | 0.94 | 0.88 | 1.01 | 0.104 |
| 75-84 | 4948 | 1.17 | 1.10 | 1.26 | <0.001 |
| ≥85 | 2230 | 1.74 | 1.61 | 1.89 | <0.001 |
| White | 12153 |  |  |  | <0.001 |
| Black | 3684 | 1.06 | 1.02 | 1.11 | 0.007 |
| American Indian/Alaska Native | 132 | 1.07 | 0.87 | 1.32 | 0.524 |
| Asian or Pacific Islander | 1069 | 0.72 | 0.67 | 0.79 | <0.001 |
| Hispanic | 2270 | 0.95 | 0.89 | 1.00 | 0.057 |
|  |  |  |  |  |  |
| M1a  M1b  M1c  2004-2010  2011-2014 | 1069  14050  4189  11221  8087 | 1.47  1.87  0.89 | 1.35  1.71  0.85 | 1.60  2.05  0.92 | <0.001  <0.001  <0.001  <0.001 |

HR: Hazard ratios. 95% CI: 95% confidence intervals.
